# Supplementary material
Source: PubMed Central journal article supplement (PMC8106664)

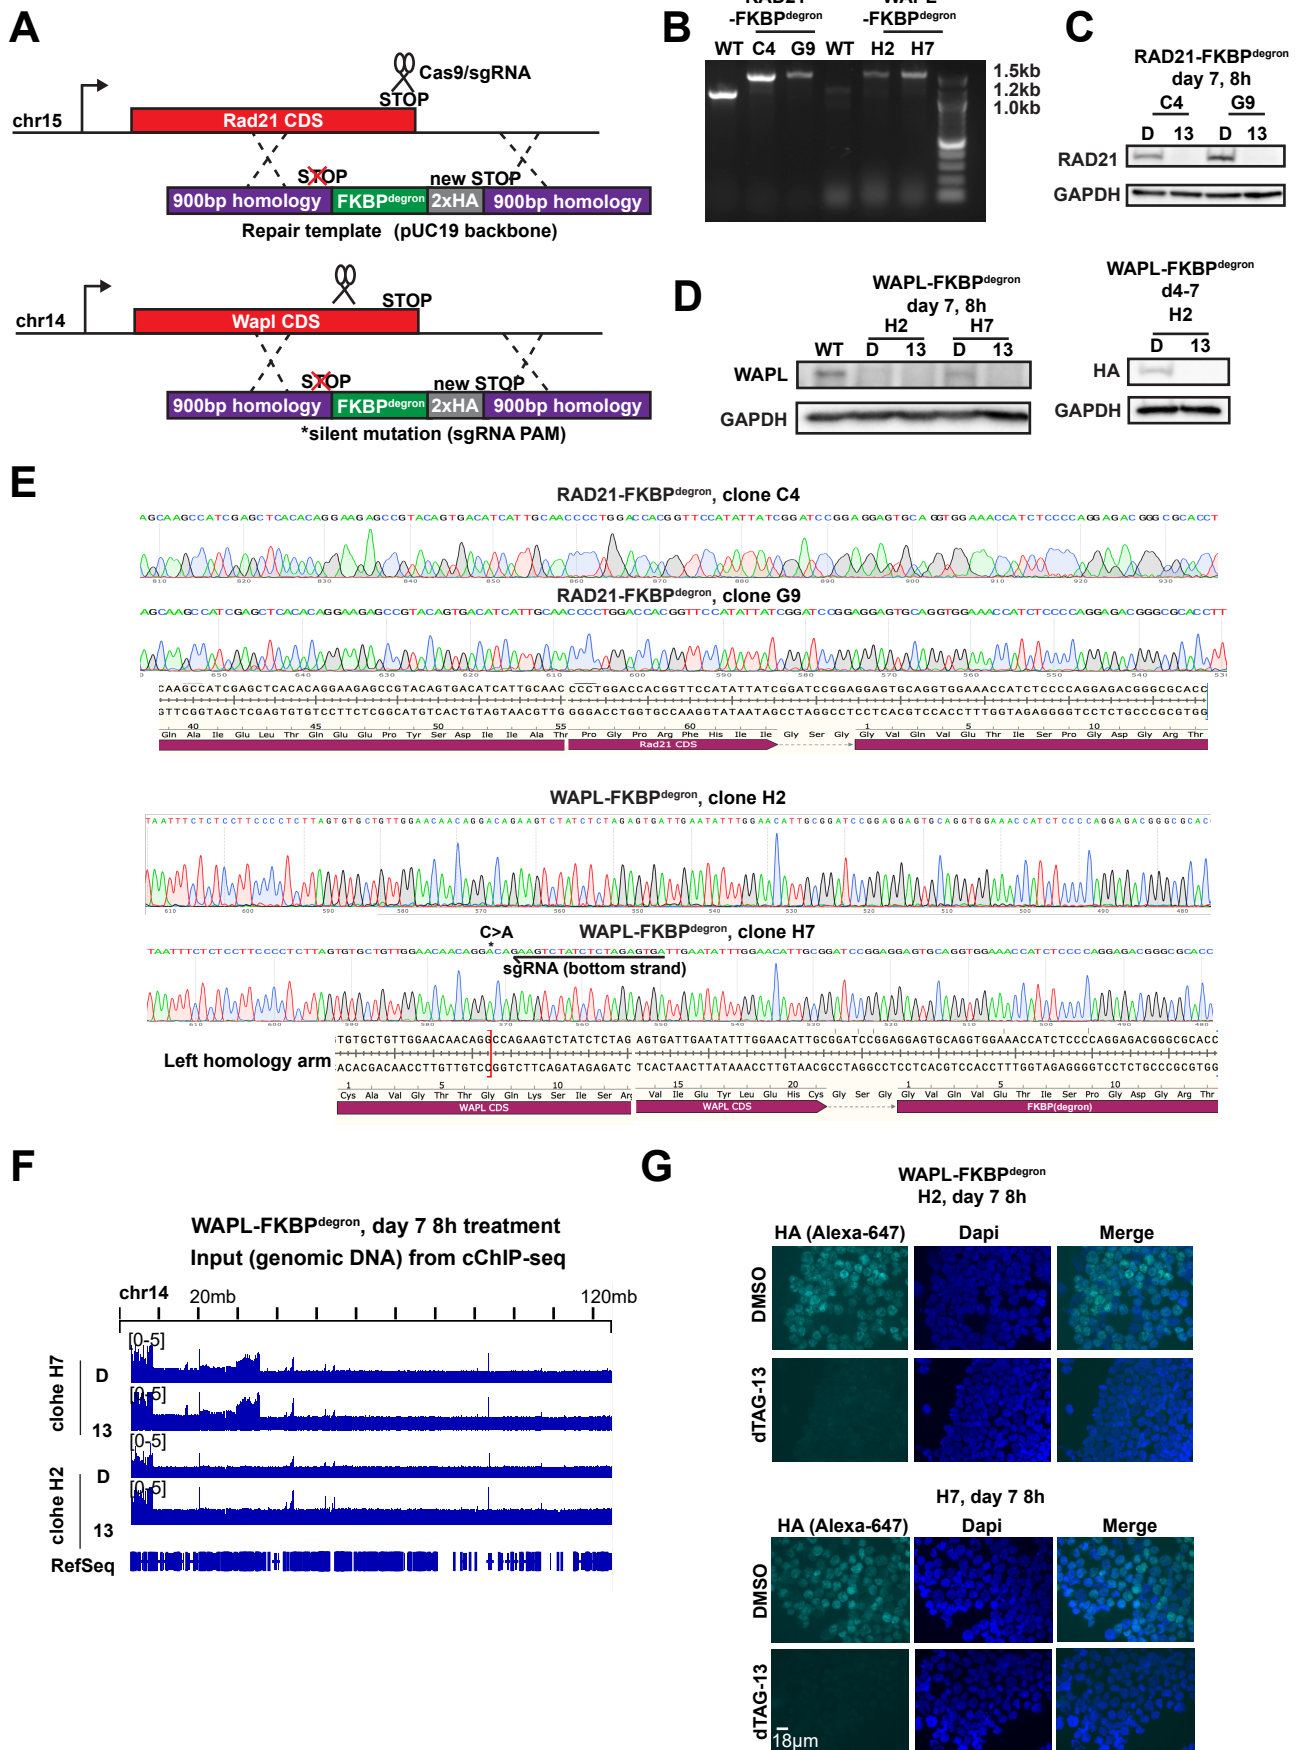

Figure S1

Supplement: NIHMS1678113-supplement-1.pdf [file NIHMS1678113-supplement-1.pdf]

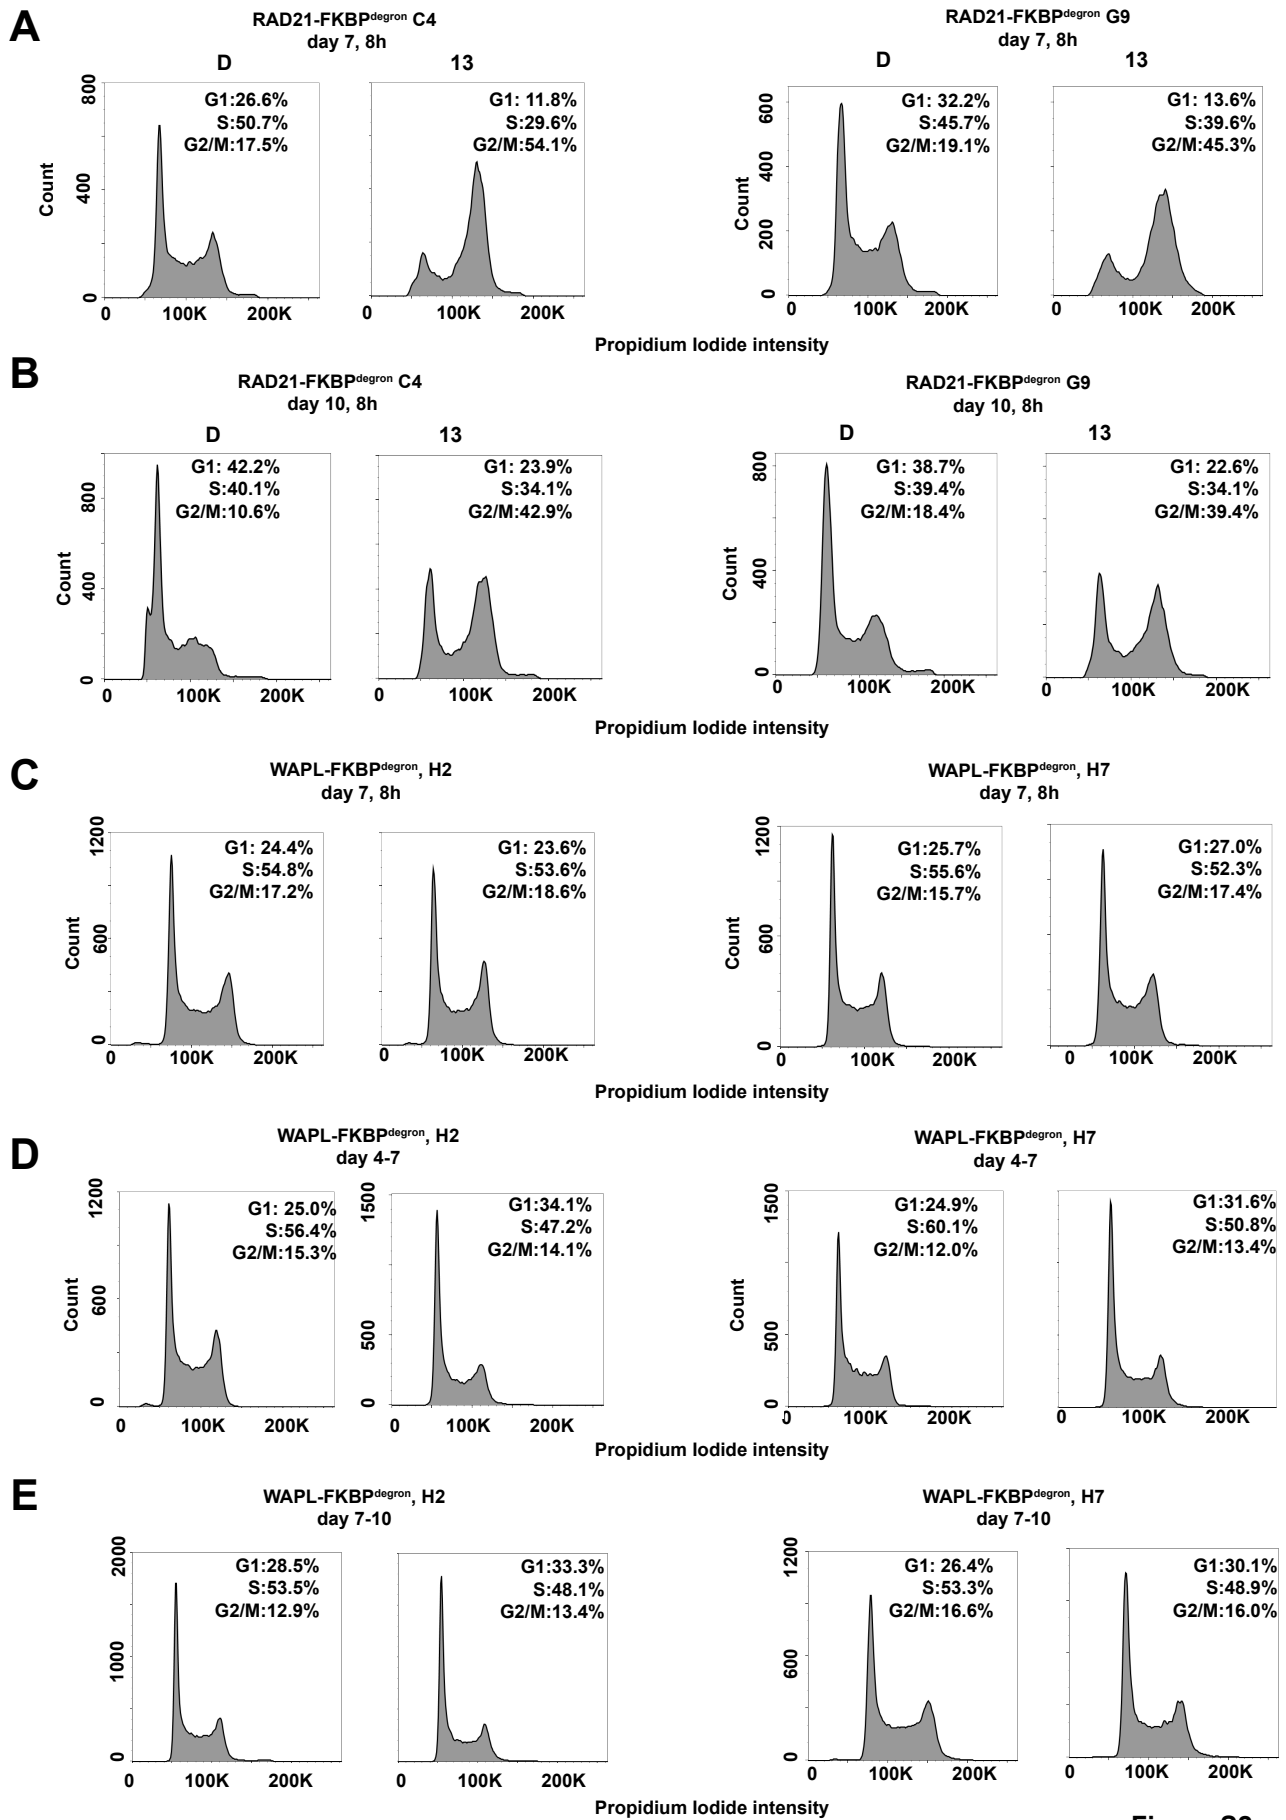

Figure S2

Supplement: NIHMS1678113-supplement-2.pdf [file NIHMS1678113-supplement-2.pdf]

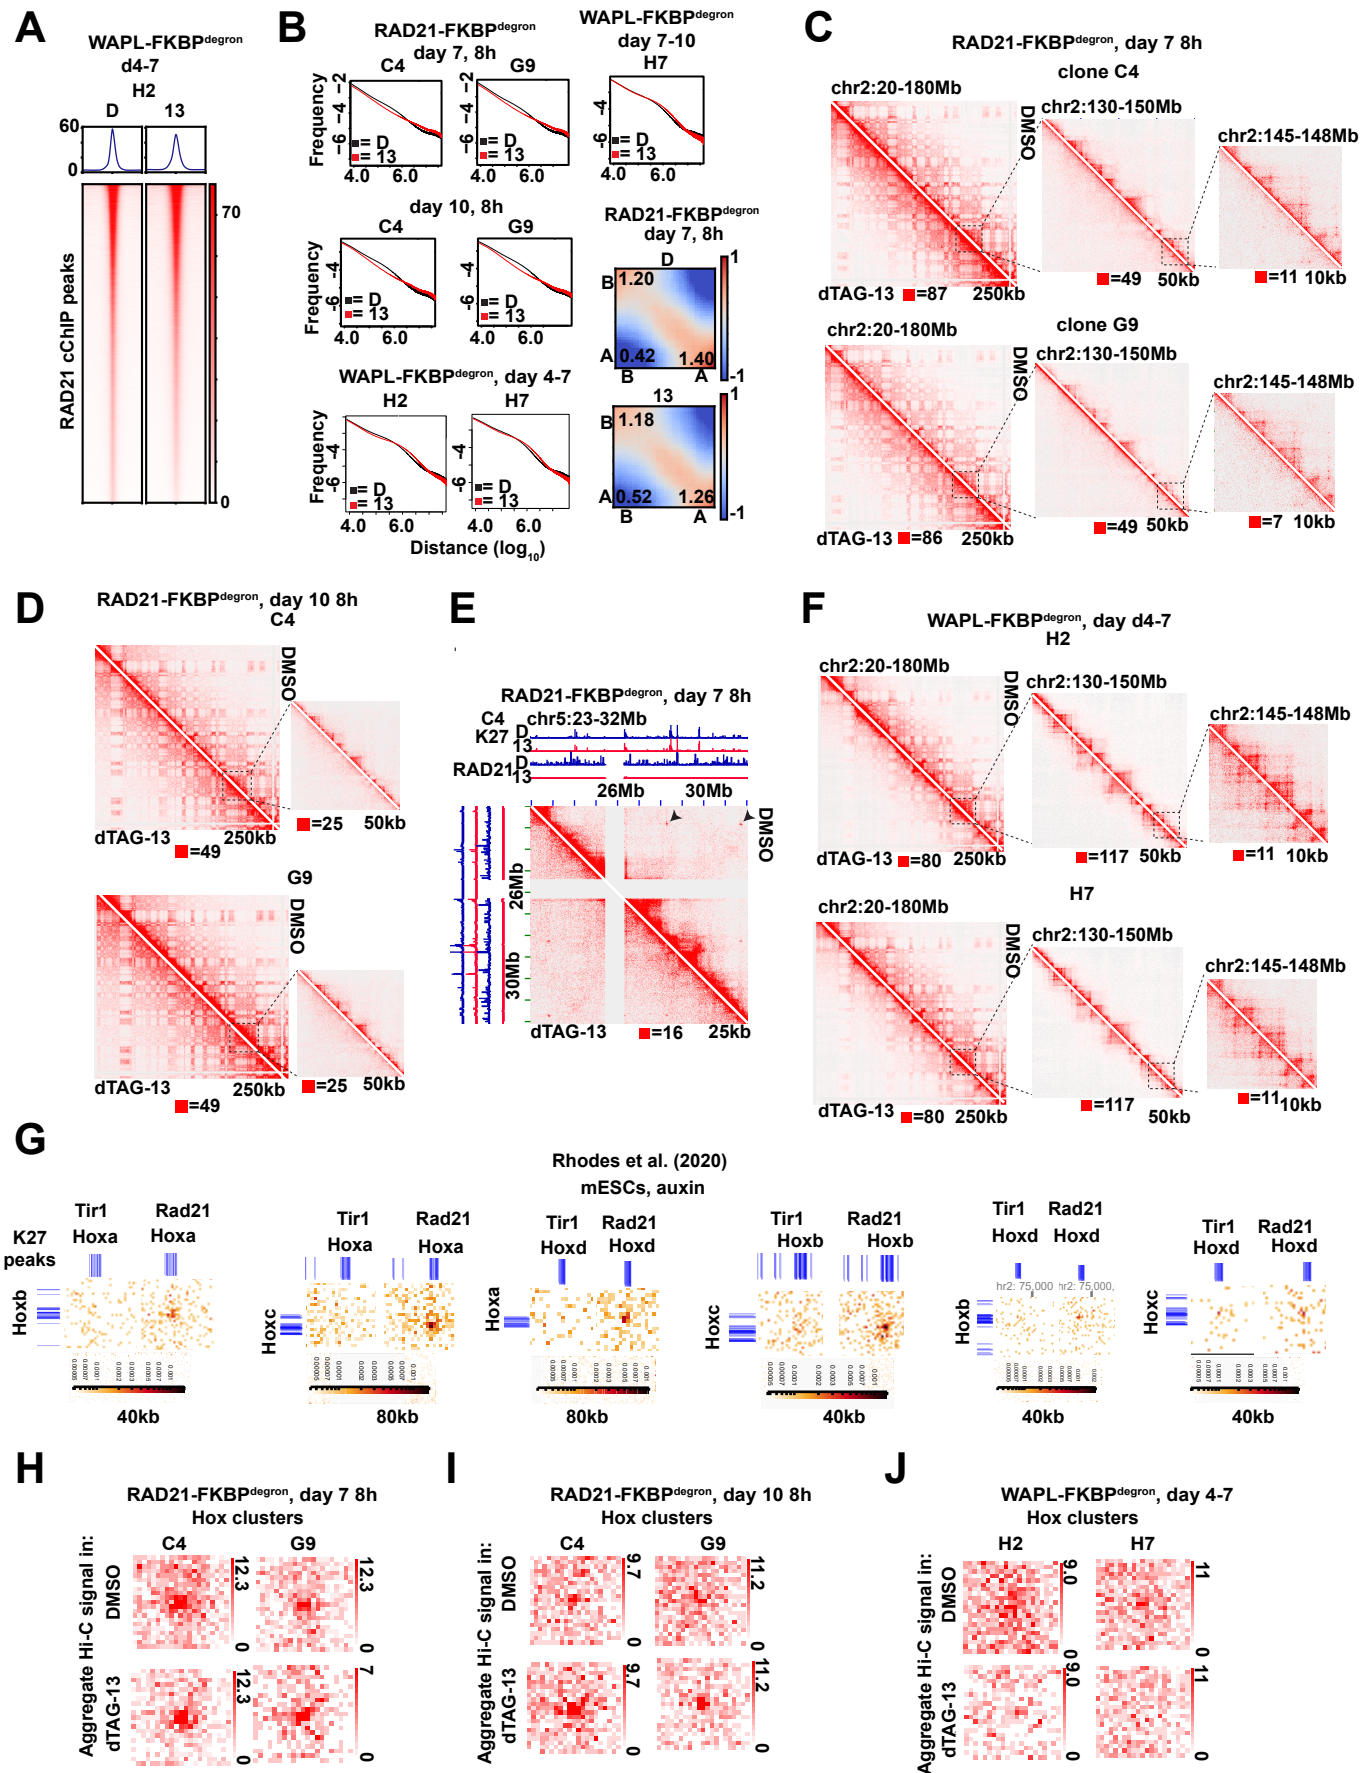

Figure S3

Supplement: NIHMS1678113-supplement-3.pdf [file NIHMS1678113-supplement-3.pdf]

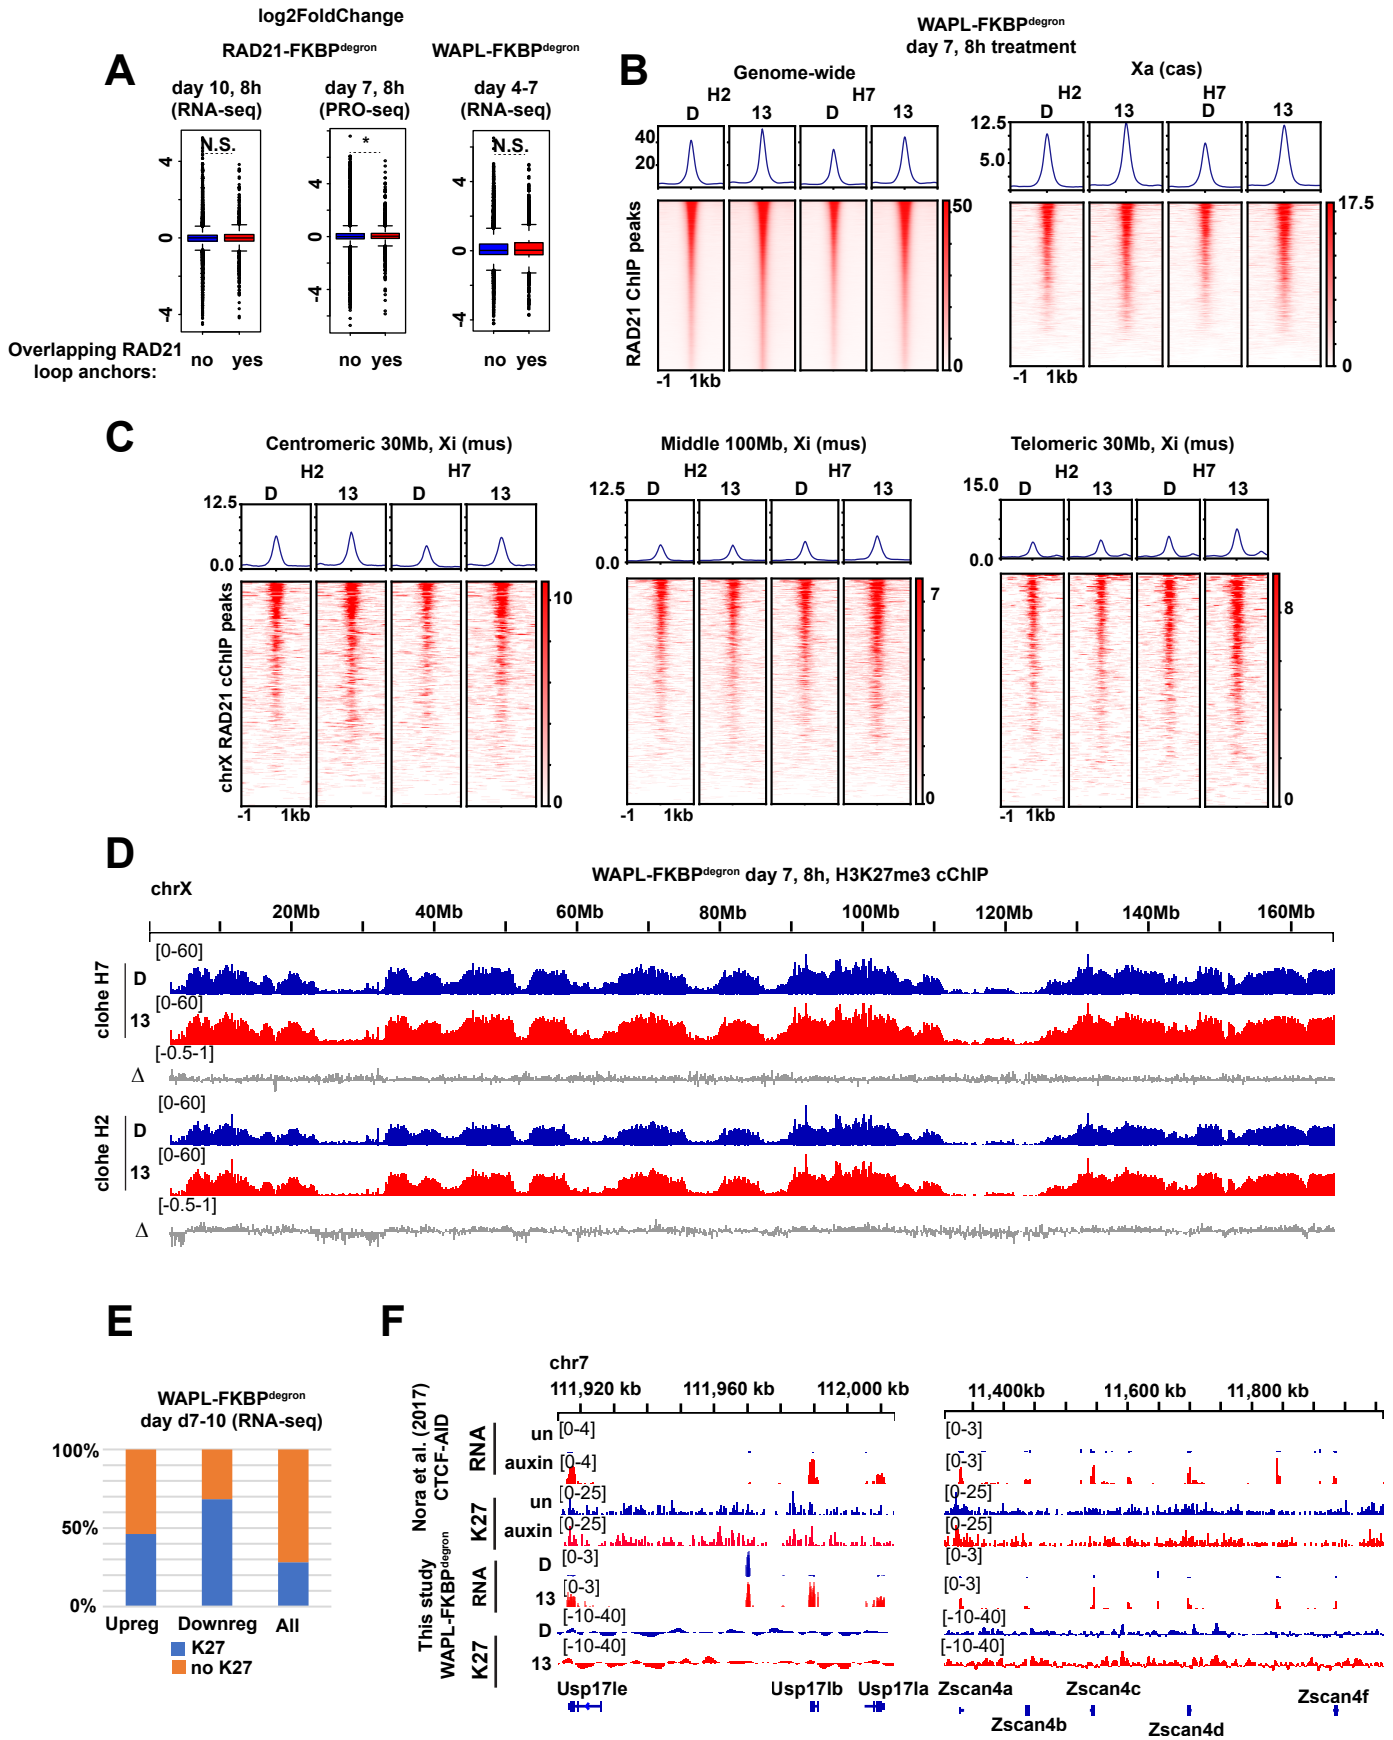

Figure S4

Supplement: NIHMS1678113-supplement-4.pdf [file NIHMS1678113-supplement-4.pdf]

**A**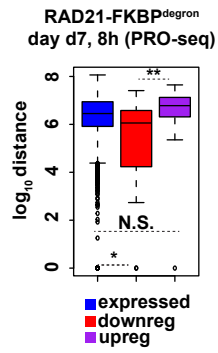**B**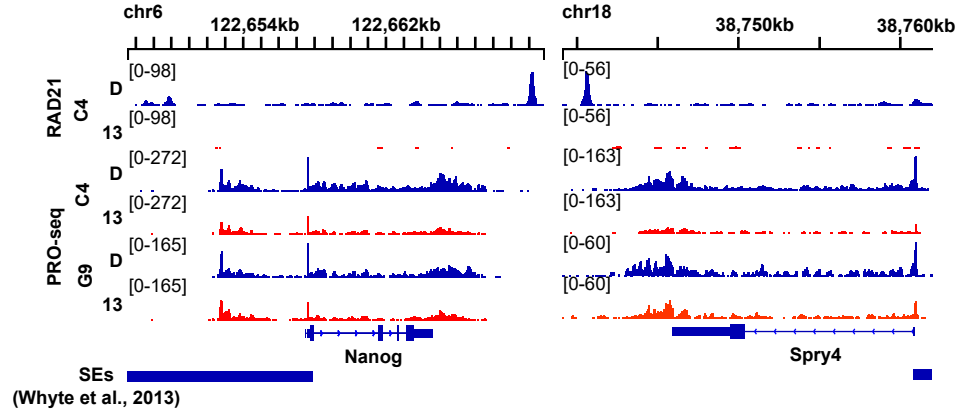**C**

### Interactions anchored by super-enhancers

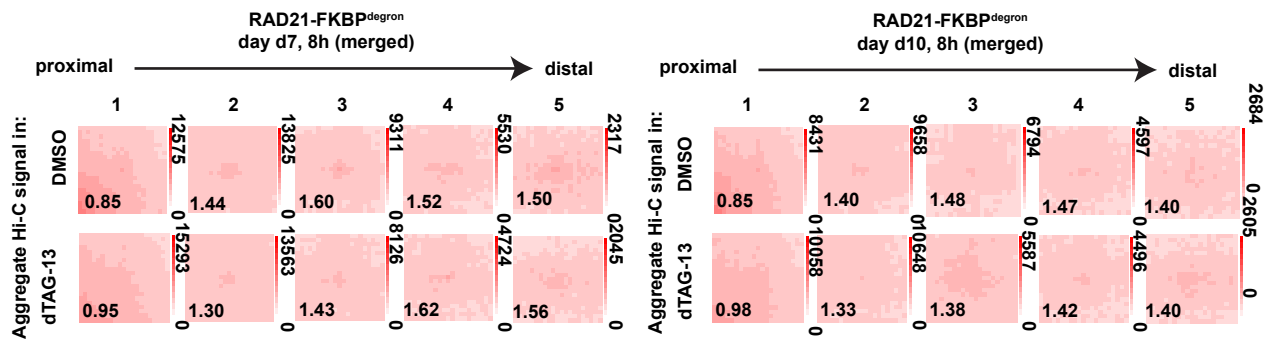

Figure S5

Supplement: NIHMS1678113-supplement-5.pdf [file NIHMS1678113-supplement-5.pdf]

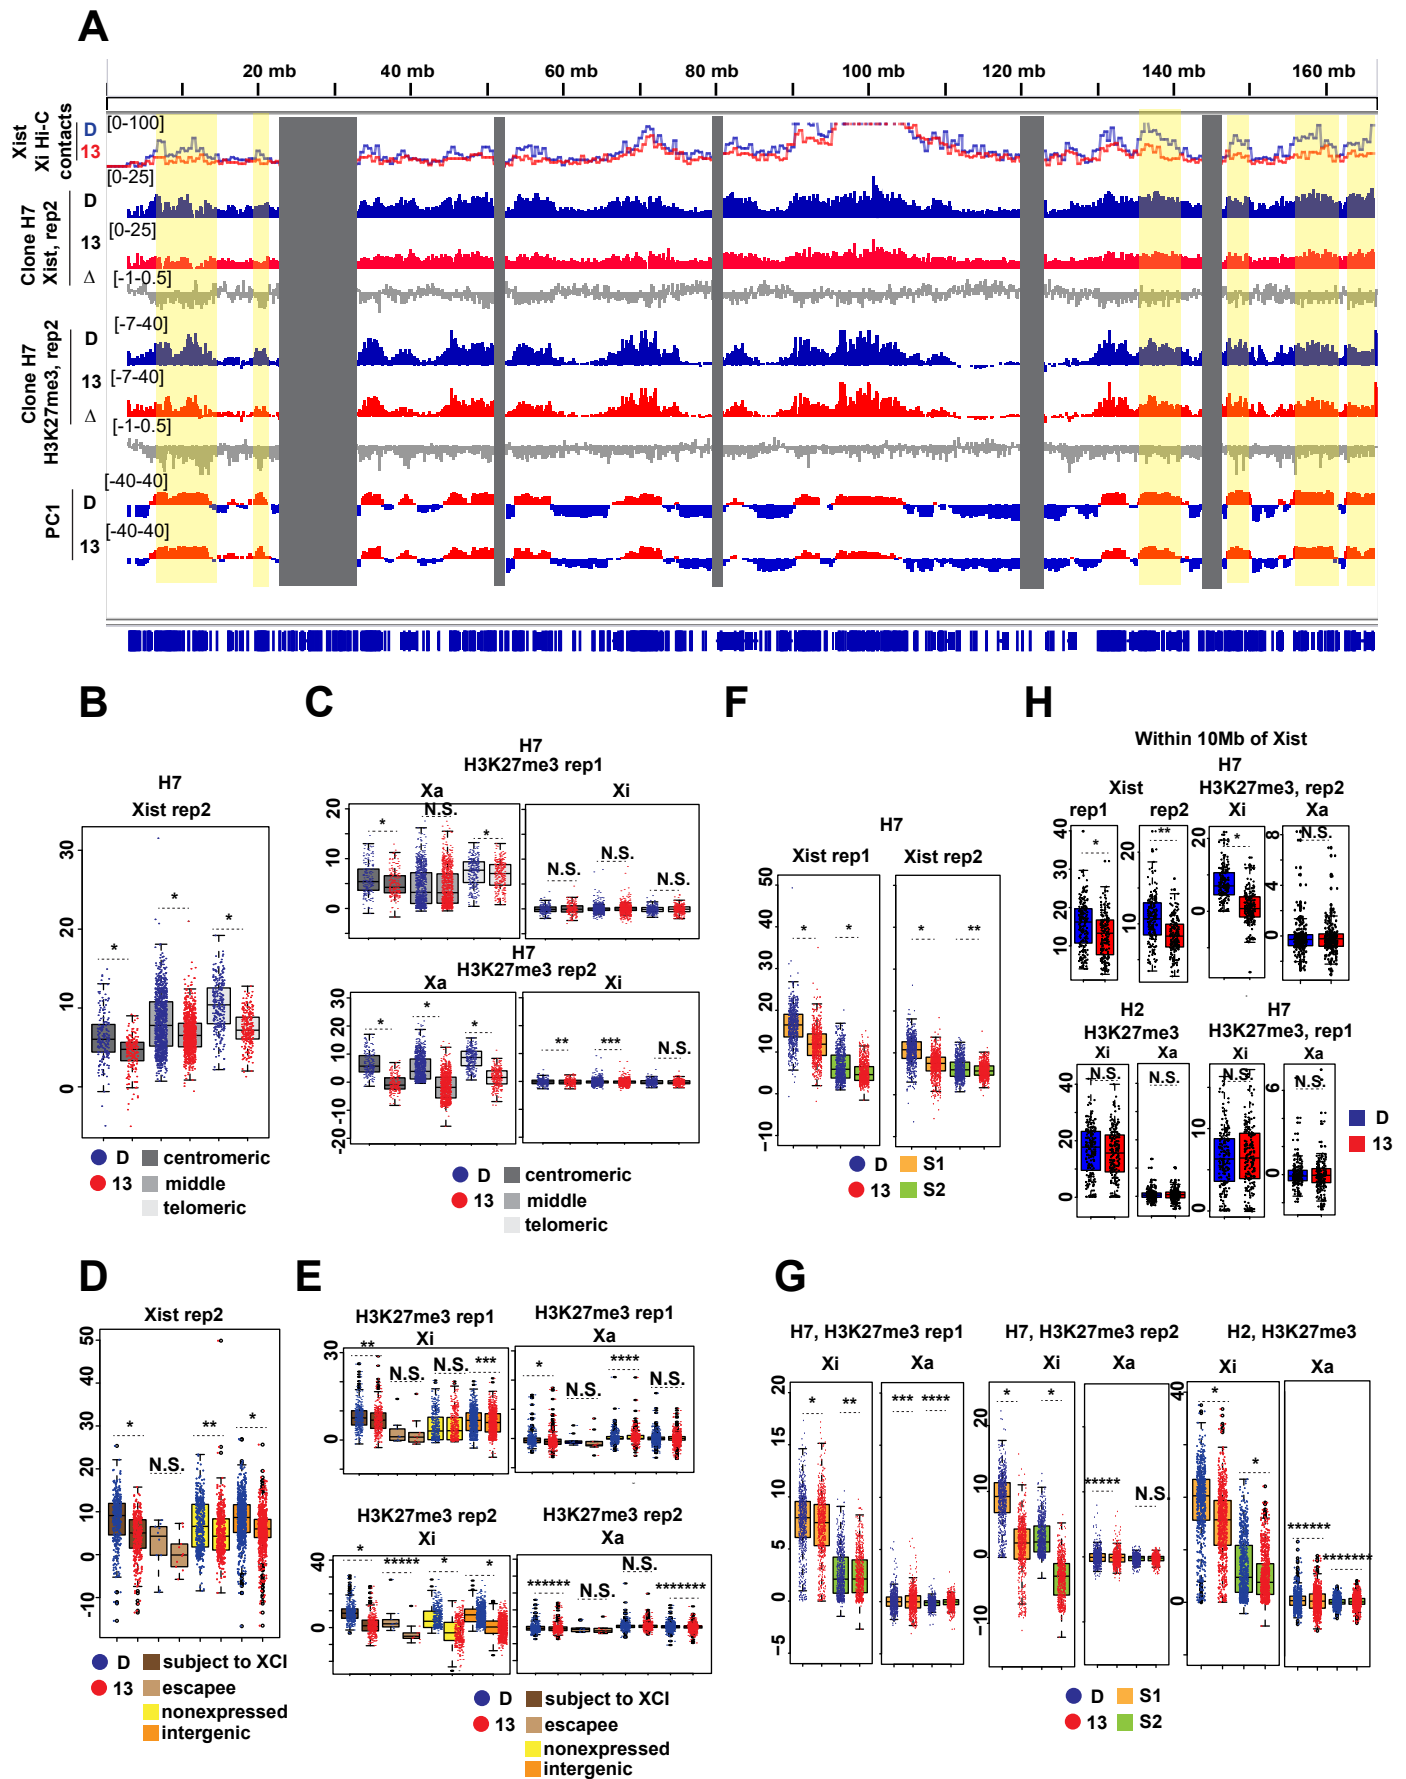

Supplement: NIHMS1678113-supplement-6.pdf [file NIHMS1678113-supplement-6.pdf]
